# Supplementary material
Source: HighWire-hosted journal article supplement (https://www.cmajopen.ca/highwire/filestream/81049/field_highwire_adjunct_files/0/2017-0137-1-at.pdf)
Supplement: 2017-0137-1-at.pdf [file 2017-0137-1-at.pdf]

| <b>Appendix 1, Supplemental Table 1 (as supplied by the authors): List of salt substitutes/enhancers</b>                                                                           |                                                                                                                                                                                                                                              |                                            |
|------------------------------------------------------------------------------------------------------------------------------------------------------------------------------------|----------------------------------------------------------------------------------------------------------------------------------------------------------------------------------------------------------------------------------------------|--------------------------------------------|
|                                                                                                                                                                                    | <b>Details/specific names that were searched for<sup>b</sup></b>                                                                                                                                                                             | <b>Found in the restaurant food supply</b> |
| <b>Salt substitutes<sup>a</sup></b>                                                                                                                                                |                                                                                                                                                                                                                                              |                                            |
| Potassium chloride (KCl)                                                                                                                                                           |                                                                                                                                                                                                                                              | yes                                        |
| Calcium chloride (CaCl <sub>2</sub> )                                                                                                                                              |                                                                                                                                                                                                                                              | yes                                        |
| Magnesium chloride (MgCl <sub>2</sub> )                                                                                                                                            |                                                                                                                                                                                                                                              | no                                         |
| Magnesium sulfate (MgSO <sub>4</sub> )                                                                                                                                             |                                                                                                                                                                                                                                              | no                                         |
| Salts with altered crystal structure                                                                                                                                               | The prevalence of this substitute could not be assessed in this study                                                                                                                                                                        | Unknown                                    |
| <b>Salt enhancers<sup>a</sup></b>                                                                                                                                                  |                                                                                                                                                                                                                                              |                                            |
| Monosodium glutamate (MSG) and other glutamates                                                                                                                                    | Monosodium glutamate (E 621), glutamic acid (E 620) , glutamate (E 620), monopotassium glutamate (E 622), calcium glutamate (E 623), monoammonium glutamate (E 624), magnesium glutamate (E 625), natrium glutamate, Umami, Ajnimoto, Vetsin | yes                                        |
| Yeast extracts and hydrolyzed vegetable proteins                                                                                                                                   | Hydrolyzed yeast protein, hydrolyzed vegetable protein, hydrolyzed yeast extract, yeast extract, torula yeast, autolyzed yeast, autolyzed plant protein, soy sauce, soy sauce extract, any "hydrolyzed protein"                              | yes                                        |
| Nucleotides                                                                                                                                                                        | Inosine-5'-monophosphate (IMP), guanosin-5'-monophosphate                                                                                                                                                                                    | no                                         |
| Amino acids                                                                                                                                                                        | Especially arginine                                                                                                                                                                                                                          | no                                         |
| Lactates                                                                                                                                                                           | Potassium lactate, calcium lactate, sodium lactate                                                                                                                                                                                           | yes                                        |
| Compounds that reduce bitterness                                                                                                                                                   | Adenosine-5'-monophosphate, DHB (2,4-dihydroxybenzoic acid), sodium gluconate                                                                                                                                                                | no                                         |
| <sup>a</sup> This list of salt substitutes and enhances is from Appendix D of the Institute of Medicine's report on "Strategies to reduce sodium intakes in the United States" (1) |                                                                                                                                                                                                                                              |                                            |
| <sup>b</sup> The list of specific names that were searched for was compiled from a variety of sources (1–3)                                                                        |                                                                                                                                                                                                                                              |                                            |

## References

1. Institute of Medicine. Strategies to Reduce Sodium Intake in the United States. Washington, DC: The National Academies Press, 2010.
2. Health Canada. Monosodium glutamate (MSG) - Questions and Answers 2008 [cited 2016 July 7]. Available from: <https://www.canada.ca/en/health-canada/services/food-nutrition/food-safety/food-additives/monosodium-glutamate-questions-answers.html>.
3. Renton A. If MSG is so bad for you, why doesn't everyone in Asia have a headache? The Guardian. 2005.
